# Supplementary material for: An intelligent artificial throat with sound-sensing ability based on laser induced graphene
Source: PubMed Central journal article supplement (PMC5333117; doi:10.1038/ncomms14579), 2017-02-24
Supplement: ncomms14579-s1.pdf [file ncomms14579-s1.pdf]

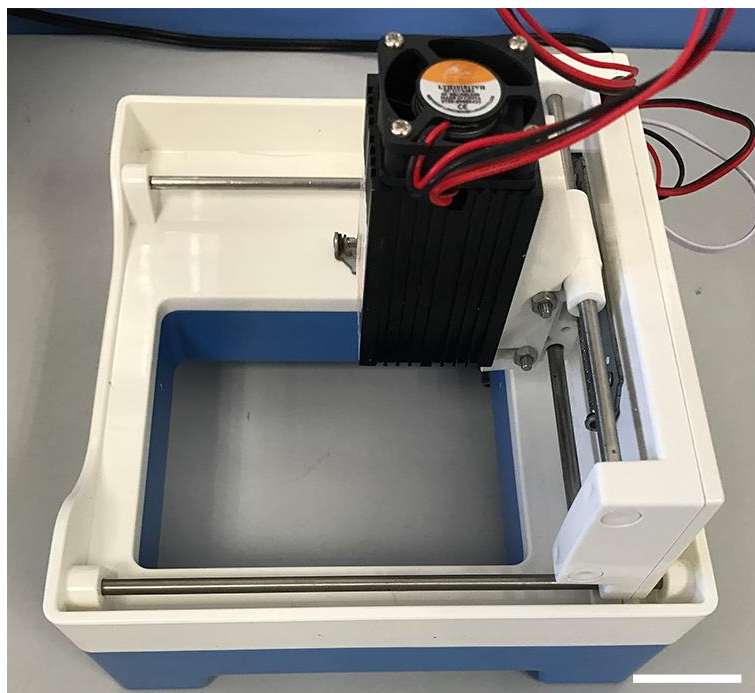

1  
2  
3  
4  
5  
6  
7  
8  
9  
10  
11  
12  
13  
14  
15  
16  
17  
18  
19  
20  
21  
22

**Supplementary Figure 1.** The photograph of the low-cost and potable laser platform. The laser platform can realize the generation of LIG with custom pattern. The wavelength of the laser diode is 450 nm and the maximum power is 500 mW. Scale bar: 2 cm

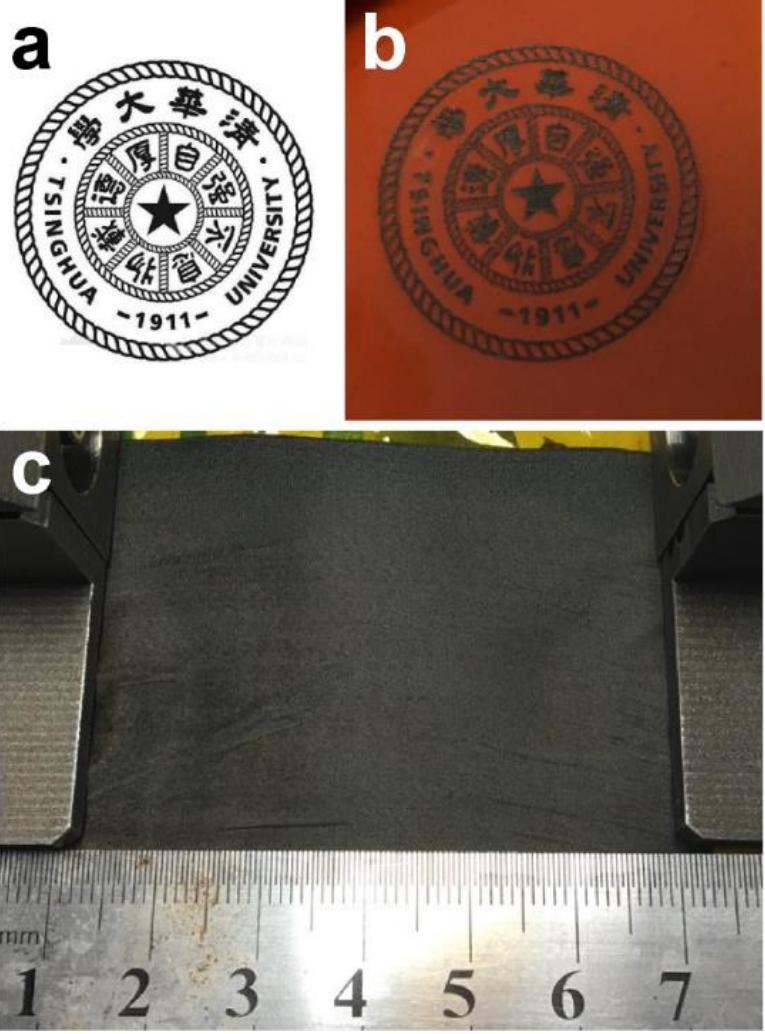

23  
24  
25  
26  
27  
28  
29  
30  
31  
32  
33  
34  
35  
36  
37  
38  
39

**Supplementary Figure 2.** The demo showing the advantage of large scale and customized pattern. (a) Original image of Tsinghua University's logo used for laser scribing on PI. (b) LIG with Tsinghua University's logo. The photo of Tsinghua University's logo is imported into the PC control software, and the same patterns are generated on the PI film. (c) Photograph of a 6cm×4cm-rectangle LIG.

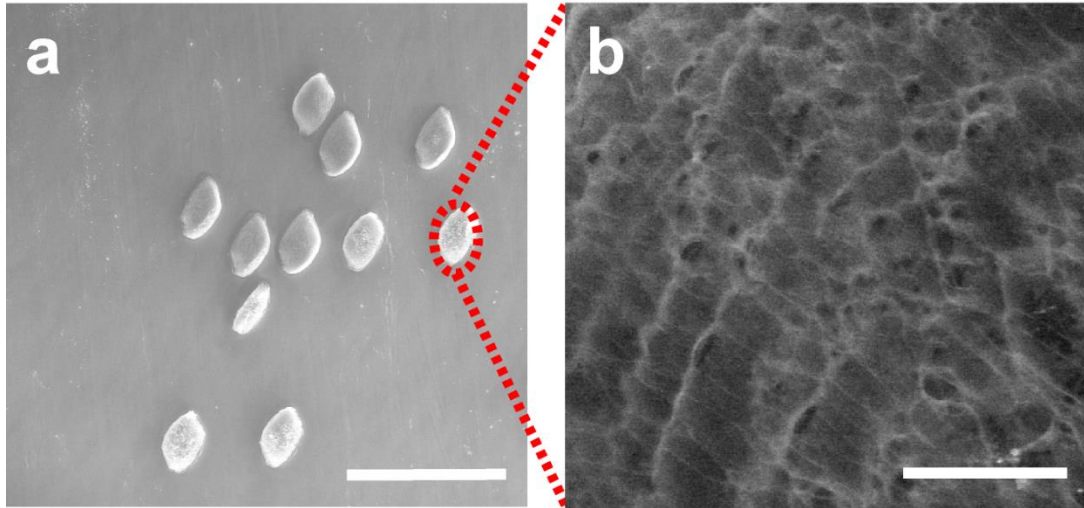

40

41

42 **Supplementary Figure 3.** The morphology of LIG sample produced at 20 mW under SEM showing  
43 a small number of LIG points are generated. **(a)** The morphology of LIG sample produced at 20  
44 mW under SEM. Scale bar: 500  $\mu\text{m}$ . **(b)** The morphology of LIG sample produced at 20 mW under  
45 high magnification. Scale bar: 15  $\mu\text{m}$ .

46

47

48

49

50

51

52

53

54

55

56

57

58

59

60

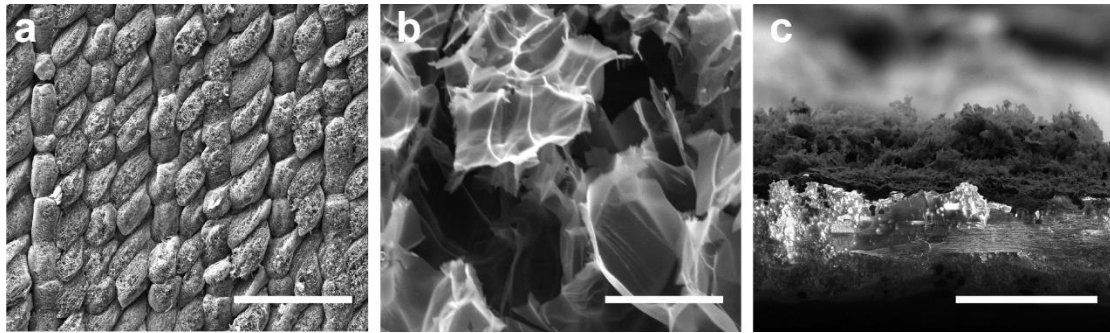

61

62

63 **Supplementary Figure 4.** The morphology of LIG sample produced at 350 mW under SEM. **(a)**

64 The morphology of LIG sample produced at 350 mW under SEM. Scale bar: 300  $\mu\text{m}$ . **(b)** The

65 morphology of LIG sample produced at 350 mW under high magnification. Scale bar: 10  $\mu\text{m}$ . **(c)**

66 Cross-sectional view of LIG sample produced at 350 mW. Scale bar: 100  $\mu\text{m}$ . Compared with the

67 SEM image of LIG at  $P=125$  mW and 290 mW (Fig. 1e-j), it's obvious that the structure generated

68 at higher power will become more porous and thicker.

69

70

71

72

73

74

75

76

77

78

79

80

81

82

83

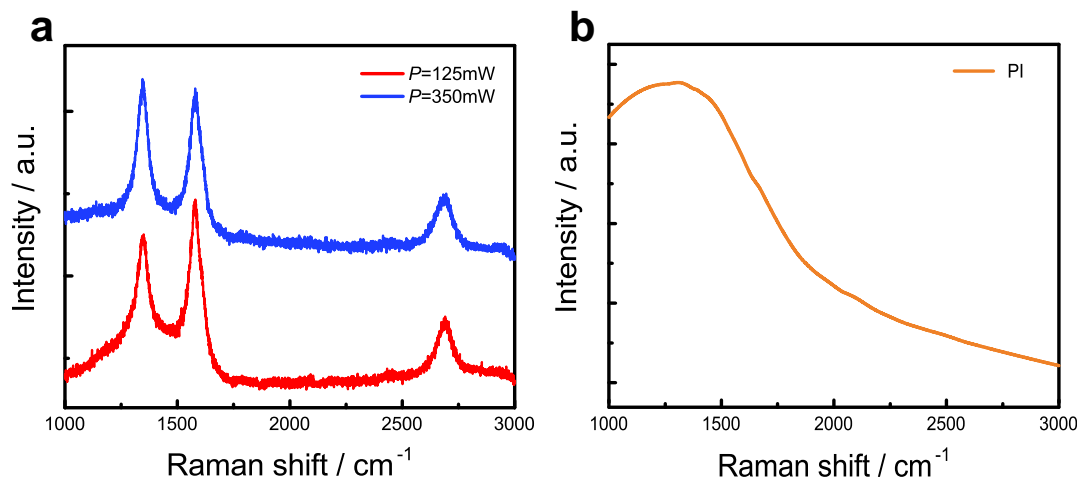

84

85 **Supplementary Figure 5.** The Raman spectrums of PI film and samples generated at  $P=125\text{ mW}$

86 and  $P=350\text{ mW}$ . (a) The Raman spectrum of LIG generated at the laser power of 125 mW and 350

87 mW. (b) The Raman spectrum of PI.

88

89

90

91

92

93

94

95

96

97

98

99

100

101

102

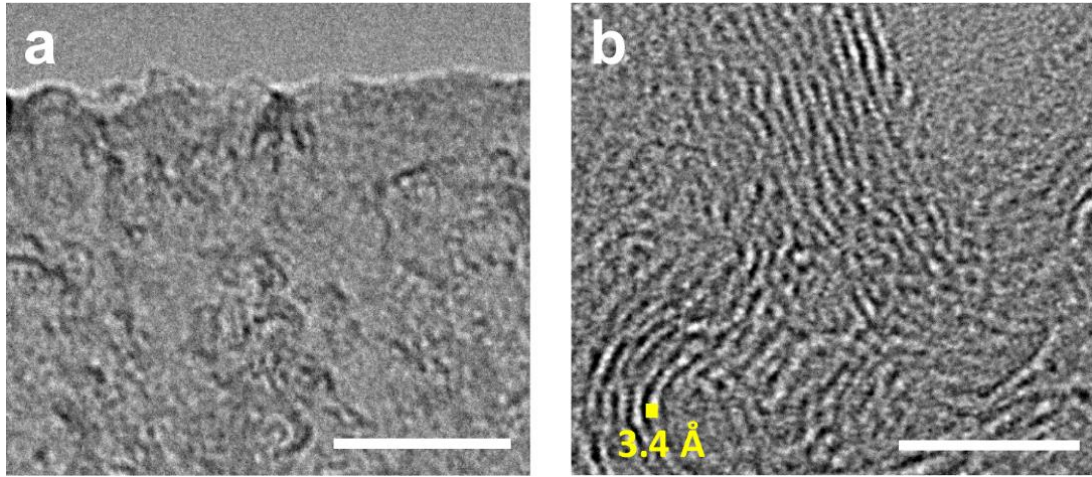

103

104

105 **Supplementary Figure 6.** The HRTEM image showing obvious lattice fringes, and the average

106 lattice space of  $\sim 3.4$  Å. **(a)** The TEM image taken at the edge of a LIG flake. Scale bar: 50 nm. **(b)**

107 The high-resolution TEM (HRTEM) image showing the lattice space of  $\sim 3.4$  Å. Scale bar: 5 nm.

108

109

110

111

112

113

114

115

116

117

118

119

120

121

122

123

124

125

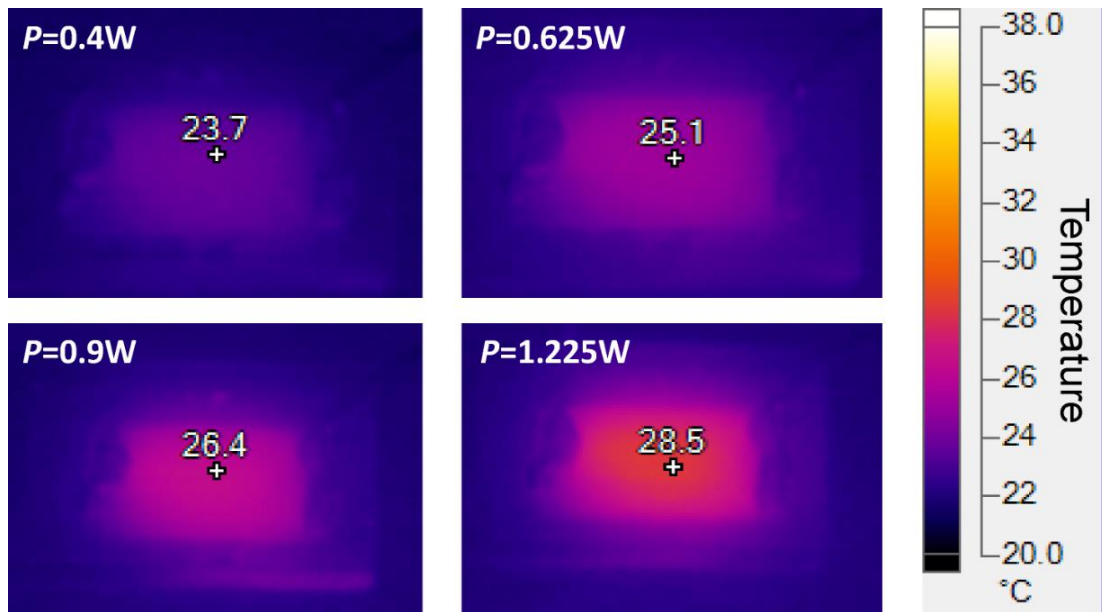

126

127

128 **Supplementary Figure 7.** The relationship between the temperature and the power. We use a  
129 thermal infrared camera (Fluke Ti200) to monitor the temperature of LIG under different input  
130 power. The working temperature are 23.7 °C with 0.4 W input power and below 29 °C even with  
131 1.225 W input power, which are acceptable when attached to the skin.

132

133

134

135

136

137

138

139

140

141

142

143

144

145

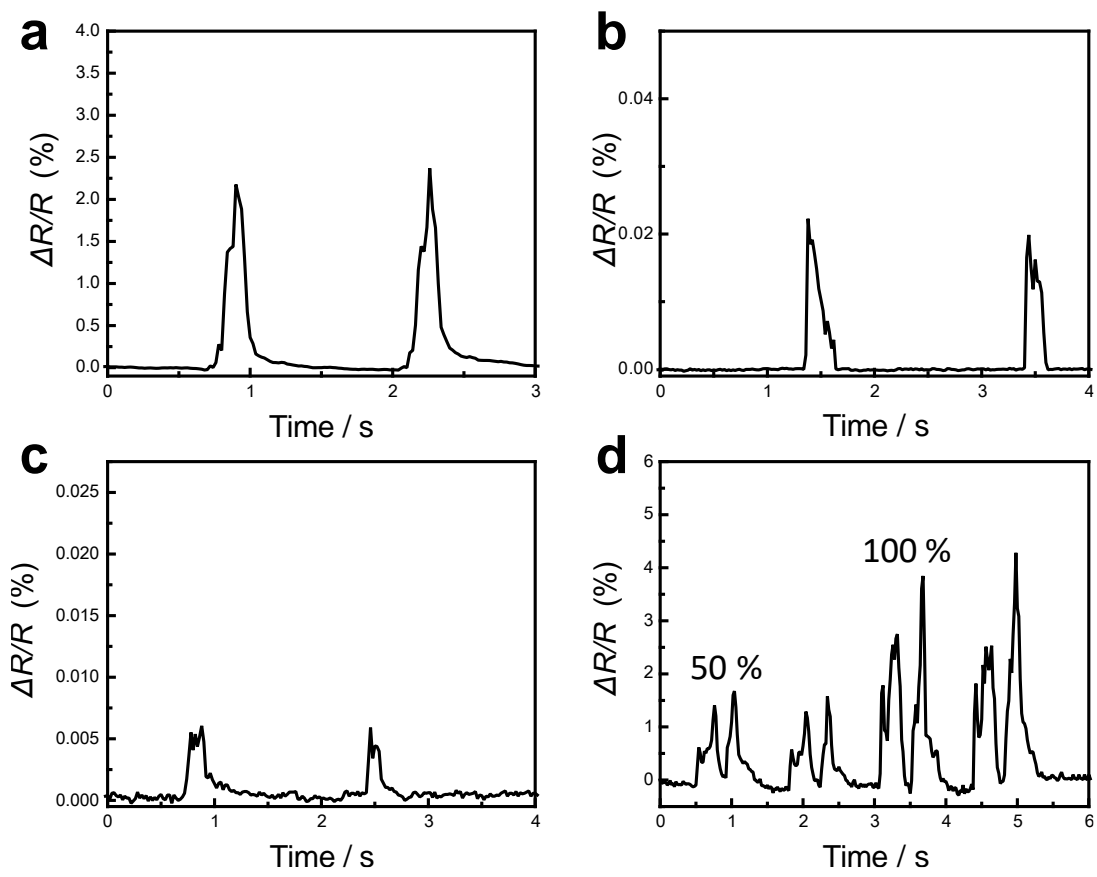

146

147 **Supplementary Figure 8.** The PI with different thickness showing different performance of  
 148 recognition. **(a)** The resistance change of LIG generated on a PI with the thickness of 25  $\mu\text{m}$ . **(b)**  
 149 The resistance change of LIG generated on a PI with the thickness of 75  $\mu\text{m}$ . **(c)** The resistance  
 150 change of LIG generated on a PI with the thickness of 180  $\mu\text{m}$ . **(d)** The resistance change under  
 151 different volumes. LIG generated on the PI with the thickness of 25  $\mu\text{m}$ , 75  $\mu\text{m}$  and 180  $\mu\text{m}$  are  
 152 placed 3 cm away from the loudspeaker, and the resistance changes are almost 2%, 0.02% and 0.005%  
 153 respectively. With the volume increases, the vibration will be strengthened, causing a more obvious  
 154 change of resistance.

155

156

157

158

159

160

161

162

163



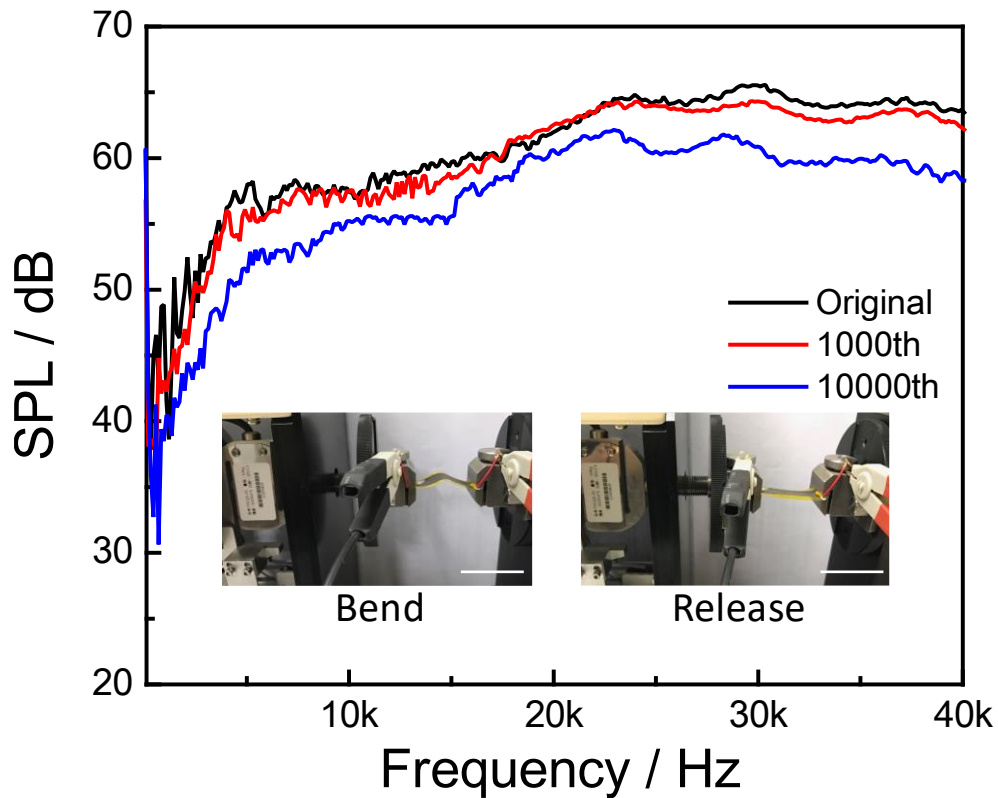

164

165

166 **Supplementary Figure 9.** The durability test of LIG up to 10000 times bending. The durability

167 measurement is performed and the LIG is clamped and bent multi times under the force. The

168 curvature radius is 1.27 cm and the stress is 0.07 N. The bending degree is higher than the vibration

169 degree caused by speaking. The testing results at original state and after 1000 cycles and 10000

170 cycle are shown. We can see the device shows excellent durability under high strain. There is no

171 obvious degradation of SPL up to 1000 times bending and a less than 5 dB degradation up to 10000

172 times bending. Scale bar: 2 cm.

173

174

175

176

177

178

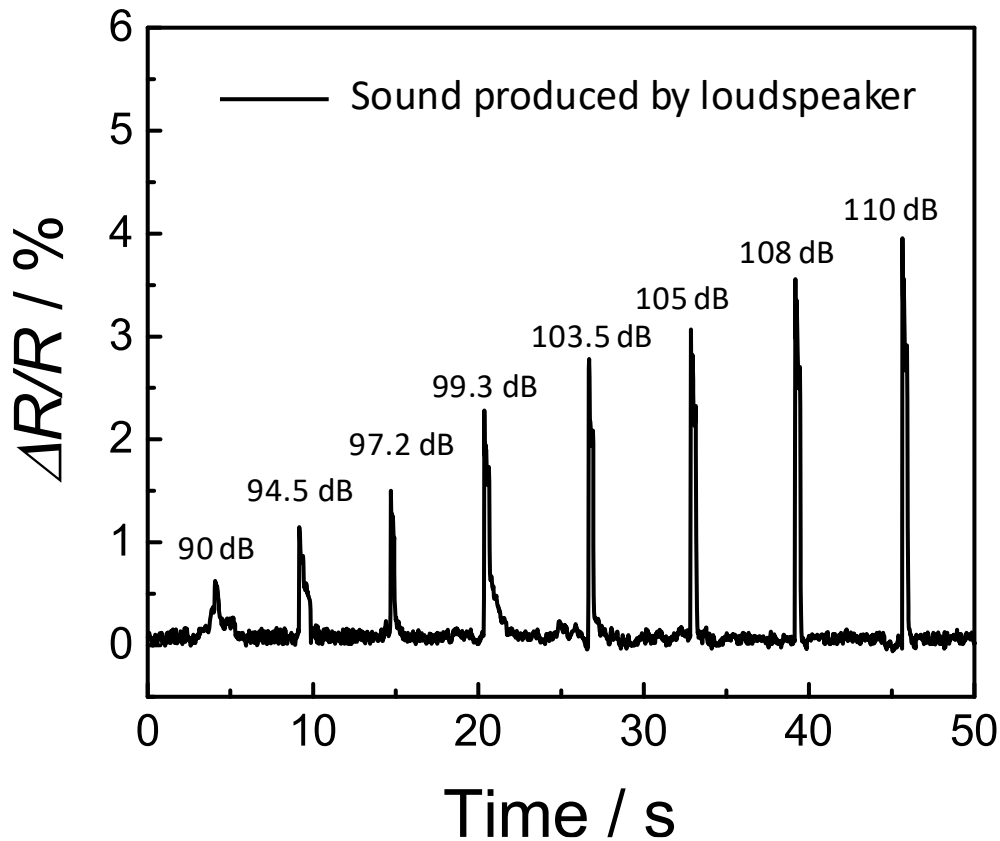

179  
 180  
 181  
 182  
 183  
 184  
 185  
 186  
 187  
 188  
 189  
 190  
 191  
 192  
 193  
 194  
 195  
 196

**Supplementary Figure 10.** The relationship between relative resistance change and sound pressure. The device was placed 3cm away from the loudspeaker and a commercial microphone was placed at the same distance to record the sound pressure level so that we can acquire the relationship between the resistance change and the sound pressure. We found that the sound pressure could cause a relative resistance change of 0.5% at 90 dB. However, the LIG attached on the throat could have a relative resistance change of 8.2% with the same sound pressure according to the figure 4c in the manuscript, which is almost 16 times larger than that induced by pure sound pressure. Therefore, we deduce that the vibration of throat cords mainly contributed the resistance change.

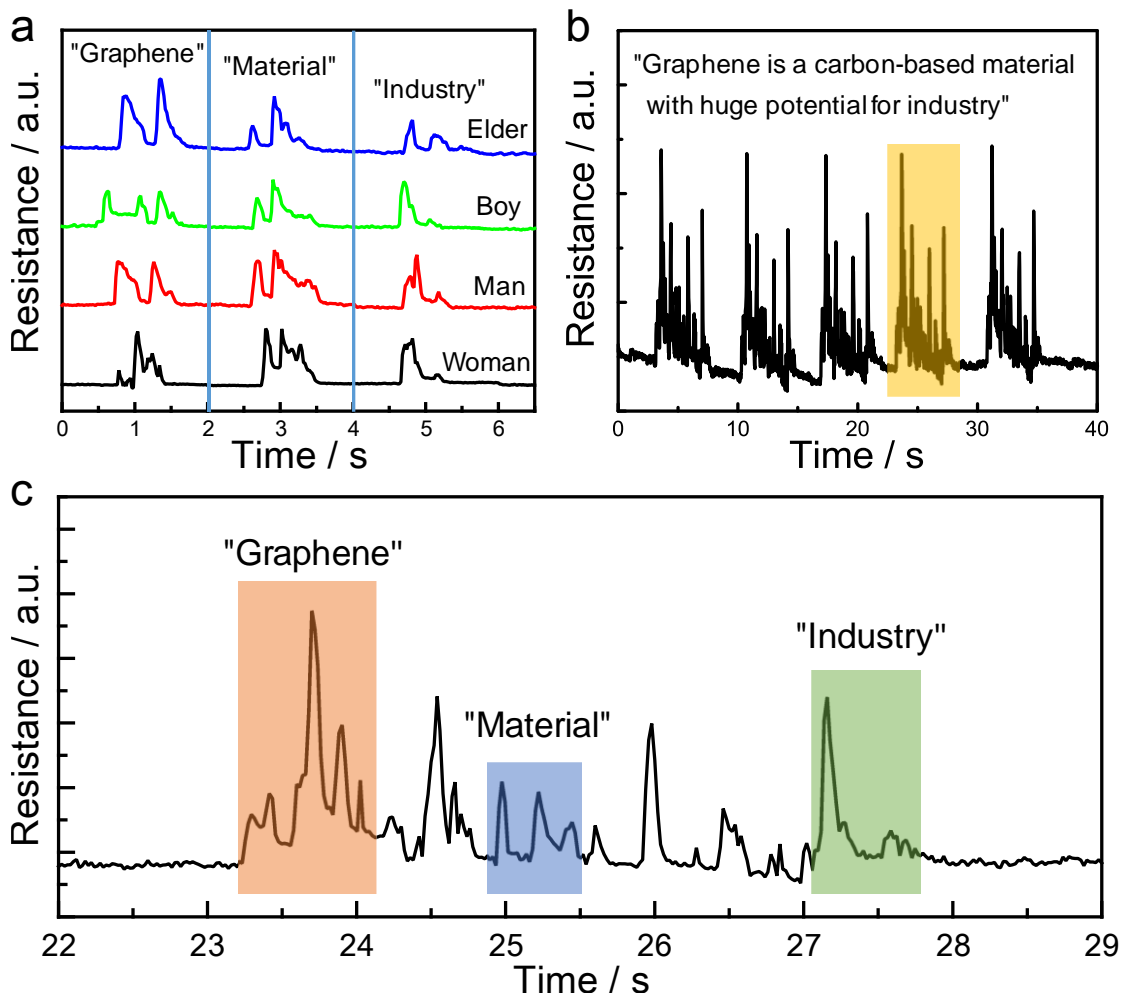

197

198 **Supplementary Figure 11.** The LIG artificial throat showing the capability of voice recognition.  
 199 (a) Three words, “graphene”, “material”, and “industry”, are pronounced by an elder, a boy, a man  
 200 and a woman respectively. (b) A long sentence “graphene is a carbon-based material with huge  
 201 potential for industry” is pronounced by a woman for five times. (c) The magnified image of the  
 202 yellow part, and “graphene” (red), “material” (blue) and “industry” (green) are marked. The wave  
 203 curves of different words in the time domain show apparently different characteristics, which is  
 204 helpful to distinguish different words. Besides, the wave curves of a same word pronounced by  
 205 different persons show similar but different characteristics, which can be a key factor for identity  
 206 authentication by voice recognition.

207

208
